# Supplementary material for: Virus goes viral: an educational kit for virology classes
Source: Springer Nature journal article supplement (doi:10.1186/s12985-020-1291-9), 2020-01-31

# Virus Goes Viral

## Infographic

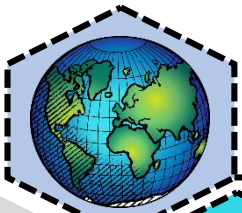

### ● Abundance

Viruses are the most numerous entities on Earth, and they are found in the majority of ecosystems.

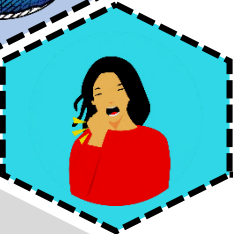

### ● Pathogenic?

Although viruses are often associated with disease, not all are pathogenic. They represent strong forces of natural selection and population control for all living organisms.

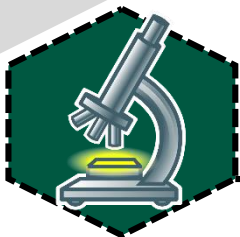

### ● Minor of minors?

Previously, viruses were considered to be the smallest group of organisms, however recent discoveries have shown the diversity of virus sizes. Some of them can even be seen from ordinary microscopes!

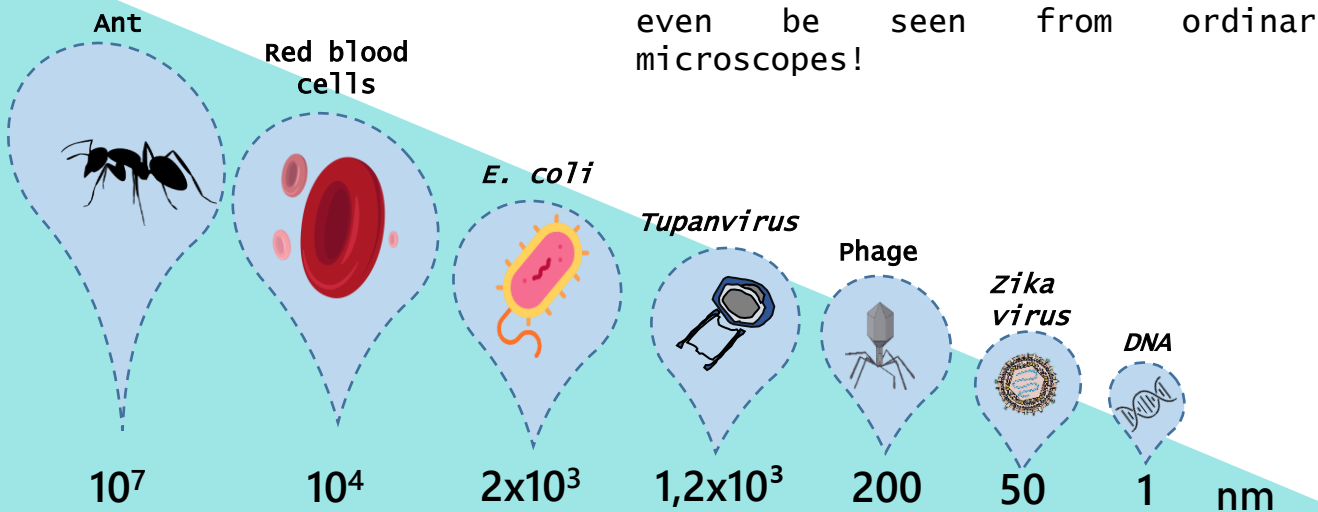

# Virus Goes Viral

## Infographic

### • Slides provided from the following viruses:

| Virus              | Family       | Genus         | Genome Type  | Genome size    | Particle Size | Major Host                                                                           | CPE                                                 |
|--------------------|--------------|---------------|--------------|----------------|---------------|--------------------------------------------------------------------------------------|-----------------------------------------------------|
| Cedravirus         | Unassigned   | Unassigned    | dsDNA        | ~590 kbp       | 1 µm          | Free Living Amoebas                                                                  | Cell rounding and nucleus loss                      |
| Chikungunya virus  | Togaviridae  | Alphavirus    | ssRNA        | 11.8 kb        | 70 nm         | Nonhuman primates and mosquitoes                                                     | Cytoplasmic blebbing, rounding, shrinkage and lysis |
| Compox virus       | Poxviridae   | Orthopoxvirus | dsDNA        | ~222 kbp       | 350-250 nm    | Woodl and rodents, cats, humans                                                      | Cell lysis (lysis plaque)                           |
| Mayaro virus       | Togaviridae  | Alphavirus    | ssRNA        | 11.8 kb        | 70 nm         | Nonhuman primates and mosquitoes                                                     | Cytoplasmic blebbing, rounding, shrinkage and lysis |
| Niemeyer virus     | Mimiviridae  | Mimivirus     | dsDNA        | ~1.3 Mb        | ~750 nm       | Free Living Amoebas                                                                  | Cell rounding and nucleus loss                      |
| Orpheovirus        | Unassigned   | Unassigned    | dsDNA        | ~1.4 Mb        | 1.3 µm        | Free Living Amoebas                                                                  | Tapering and increased motility                     |
| Pandoravirus       | Unassigned   | Unassigned    | dsDNA        | ~2.5 Mb        | 1 µm          | Free Living Amoebas                                                                  | Cell rounding and nucleus loss                      |
| Tupanvirus         | Mimiviridae  | Unassigned    | dsDNA        | 1.44 - 1.51 Mb | > 2 µm        | Free Living Amoebas                                                                  | Formation of bunches                                |
| Vaccinia virus     | Poxviridae   | Orthopoxvirus | dsDNA        | ~190 kbp       | 350-250 nm    | Cattle, buffaloes, humans                                                            | Cell lysis (lysis plaque)                           |
| Yellow fever virus | Flaviviridae | Flavivirus    | (+)sense RNA | ~11 kb         | 40-50 nm      | Non-human primates, humans, mosquitoes ( <i>Aedes</i> and <i>Haemagogus</i> species) | Cell lysis (lysis plaque)                           |

### Diversity ●

Viruses are very diverse, come in many shapes, sizes, different genetic materials. Features selected throughout evolution to succeed in infecting their hosts.

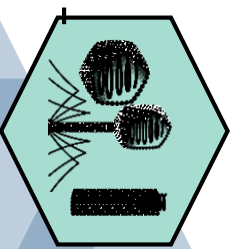

# Virus Goes Viral Infographic

- General cycle of replication

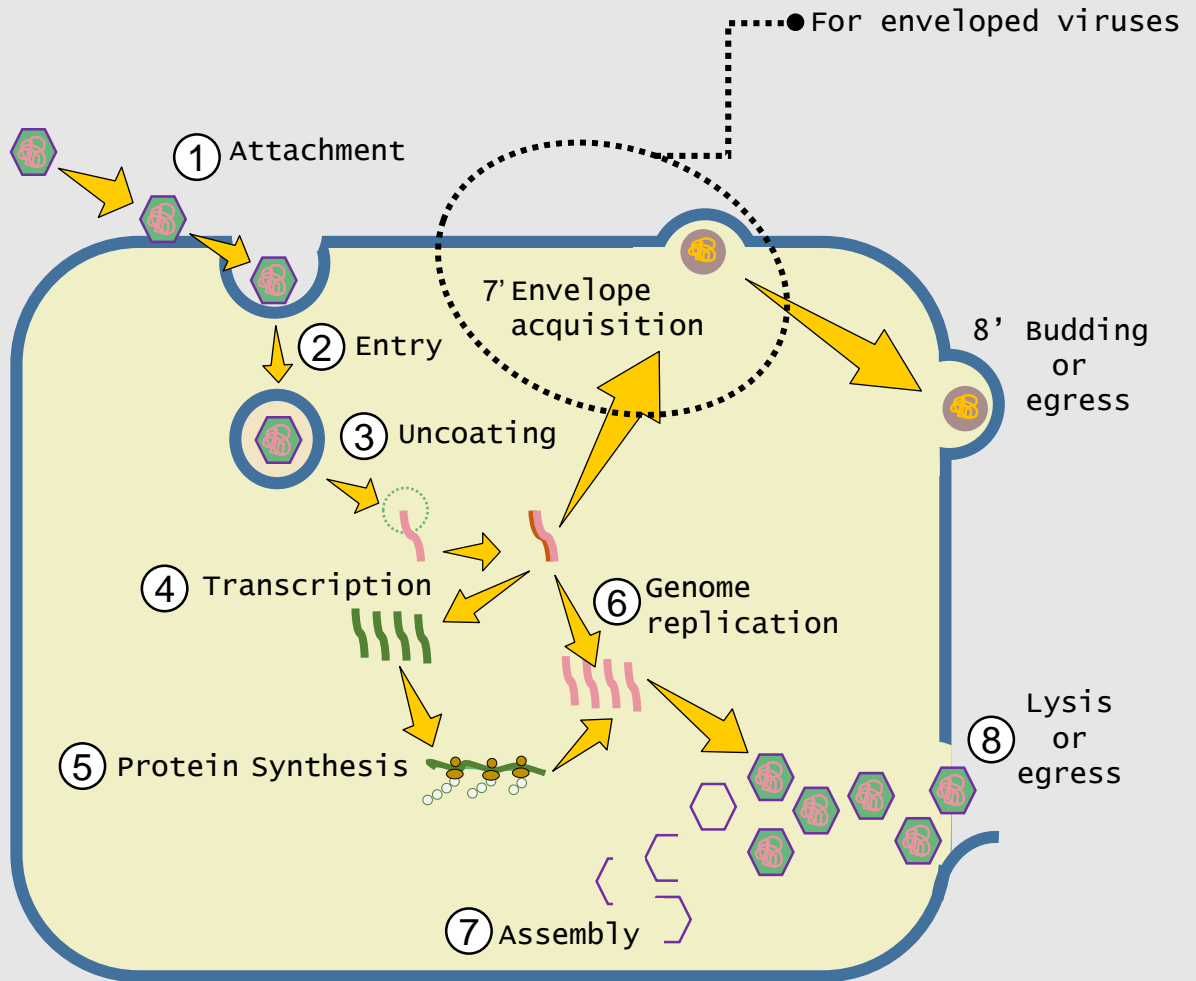

## Intracellular parasites •

Viruses are obligate intracellular parasites, so they use the machinery of infected cells to multiply. Although each virus may have its own peculiarities during its replication cycle, it usually goes through the steps described above.

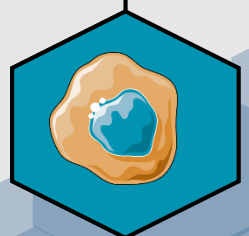

# Virus Goes Viral

## Infographic

- virus-cell interaction: lysis plaques

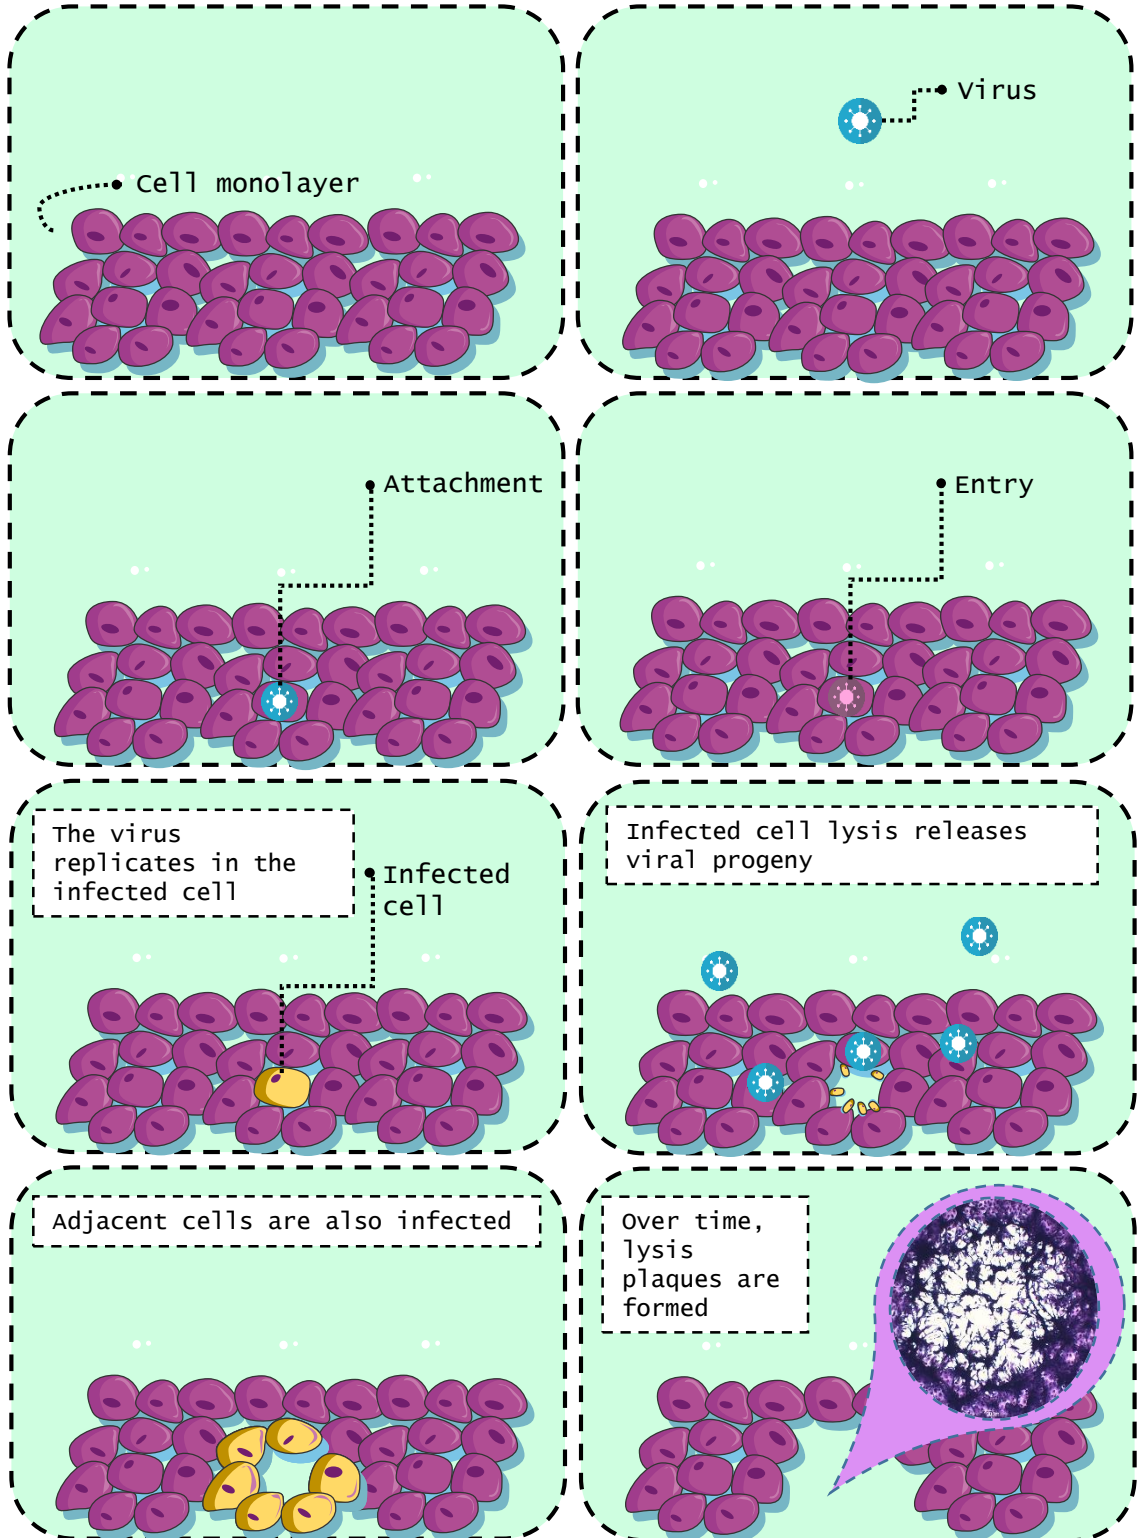

Supplement: MOESM3 [file 17614398]
